# Supplementary material
Source: publisher figshare collection journal article supplement (https://springernature.figshare.com/ndownloader/files/24015935)
Supplement: Supplementary file 1 [file 24015935]

# **NOTE: Two authors were inadvertently left off of the author list in our original submission-this document provides a corrected author list.**

# **Stage 1 Registered Report****: Nature Human Behaviour**

**A global test of brief reappraisal interventions on emotions during the COVID-19 pandemic**

Ke Wang1, Amit Goldenberg2, Charles A. Dorison1, Jeremy K. Miller3*, Andero Uusberg4, Jennifer S. Lerner1,5, James J. Gross6, & Psychological Science Accelerator*

1 Harvard Kennedy School, Harvard University, Cambridge, US

2 Harvard Business School, Harvard University, Boston, US

3 Department of Psychology, Willamette University, Salem, US

4 Institute of Psychology, University of Tartu, Estonia

5 Department of Psychology, Harvard University, Cambridge, US

6 Department of Psychology, Stanford University, Stanford, US

*Corresponding author: Jeremy K. Miller ([millerj@willamette.edu](mailto:millerj@willamette.edu))

*A list of authors and their affiliations appears in the supplemental materials.

# **Author contributions**

K.W., A.G., C.A.D., J.S.L., A.U. and J.J.G. designed the research. K.W. wrote the initial draft. K.W., A.G., C.A.D., J.S.L., J.J.G., J.K.M., and P.F. reviewed and edited the manuscript. J.K.M. coordinated the implementation of the project with the PSA consortium. P.F. conducted the power analysis and managed the OSF repository of the project. L.D., B.A., and B.P. contributed to the analysis plan. E.B. coded the experimental tasks. The rest of the authors from the PSA consortium provided comments on the manuscript. All authors listed in the PSA consortium will contribute to either data collection and/or translation and will review and approve the final manuscript.

# List of Psychological Science Accelerator Covid Rapid Team Members and Their Affiliations

***Psychological Science Accelerator Members***

Chris Aberson1, Balazs Aczel2, Matúš Adamkovič3, Adeyemi Adetula4, Arca Adiguzel5, Reza Afhami6, Afroja Ahmed7, Elena Agadullina8,El Rim Ahn9, Kanza Ait El Arabi10, Handan Akkas11, Nihan Albayrak-Aydemir12, Tara Allred13, Sara Álvarez Solas14, Sara Alves15, Inês Almeida16, Gulnaz Anjum17, Jan Antfolk18, Nwadiogo Chisom Arinze19, Patrícia Arriaga20, John Jamir Benzon Aruta21, Alexios Arvanitis22, Adrian Dahl Askelund23, Mohammad Atari24, Habiba Azab25, Soufian Azouaghe26, Peter Babincak27, Hui Bai28, Busra Bahar Balci29, Gabriel Banik30, Krystian Barzykowski31, Ernest Baskin32, Sanja Batić Očovaj33, Carlota Batres34, Jozef Bavolar35, Labadi Beatrix36, Maja Becker37, Behzad Behzadnia38, Anabel Belaus39, Abderrahim Benlahcene40, Sara Bergo41, Jana Berkessel42, Michał Białek43, Gijs Bijlstra44, Natalia Bogatyreva45, Ahmed Bokkour46, Daniel Boller47, Leanne Boucher48, Jordane Boudesseul49, Alexandre Bran50, Markéta Braun Kohlová51, Hilmar Brohmer52, Erin Buchanan53, Carsten Bundt54, Muhammad Mussaffa Butt55, Lisa Bylinina56, Laura Calderón Pérez57, Robert Calin-Jageman58, Joelle Carpentier59, Nicola Cellini60, Jared Celniker61, Klara Cera62, Chris Chartier63, Zhang Chen64, Sau-Chin Chen65, Peilian Chi66, Faith Chiu67, William Chopik68, Weilun Chou69, Sami Coksan70, Nicholas Coles71, Matt Collins72, Melissa Colloff73, Nadia Corral-Frias74, Pablo Correa75, Rita Correia76, Julio Eduardo Cruz Vásquez77, Johanna Czamanski-Cohen78, Shimrit Daches79, Ilker Dalgar80, Anna Dalla Rosa81, Kaja Damnjanović82, William Davis83, Telli Davoodi84, Anabel De La Rosa Gómez85, Silvia De Pompeis86, Daliborka Dimova87, Barnaby Dixson88, Ikhlas Djamai89, Roos Doekemeijer90, Artur Domurat91, Hongfei Du92, Dmitrii Dubrov93, Charlotte Eben94, Will Eineman95, Ismail El96, Barbara Ercoli97, Tolga Ergiyen98, Celia Esteban Serna99, Luis Eudave100, Thomas Evans101, Gilad Feldman102, Susann Fiedler103, Andrej Findor104, Heather Flowe105, Paul Forbes106, Jacques Forest107, Patrick Forscher108, Martha Frias-Armenta109, Cynthia Fu110, Shawn Geniole111, Tripat Gill112, Biljana Gjoneska113, Hendrik Godbersen114, Amélie Gourdon-Kanhukamwe115, Caterina Grano116, Anna Greenburgh117, Dmitry Grigoryev118, Maurice Grinberg119, Agata Groyecka120, Redeate Habte121, Nandor Hajdu122, Paul Hanel123, Andree Hartanto124, Mikayel Harutyunyan125, Javad Hatami126, Daphna Hausman Ozery127, Alejandrina Hernandez128, Gabriela Hofer129, Tom Hostler130, Monika Hricova131, Evgeniya Hristova132, Matej Hruška133, Barbora Hubena134, Keiko Ihaya135, Peder Isager136, Tatsunori Ishii137, Bastian Jaeger138, Allison Janak139, Steve Janssen140, Lisa Jaremka141, Lady Grey Javela Delgado142, Teodor Jernsäther 143, Xiaoming Jiang144, William Jimenez-Leal145, Jennifer Joy-Gaba146, Muhib Kabir147, Ondrej Kacha148, Pavol Kačmár149, Lada Kaliska150, Gwenael Kaminski151, Heather Kappes152, Cemre Karaarslan153, Alper Karababa154, Christiana Karashiali155, Maria Karekla156, Angelos Kassianos157, Ahmed Khaoudi158, Meetu Khosla159, Julita Kielińska160, Komil Kirgizova161, Halil Emre Kocalar162, Monica Koehn163, Max Korbmacher164, Małgorzata Kossowska165, Vanja Kovic166, Marta Kowal167, Luca Kozma168, Luca Kozma169, Anthony Krafnick170, Valerija Križanić171, Franki Kung172, Yoshihiko Kunisato173, Jonas Kunst174, Anna Kuzminska175, Sau Yi Kwan176, Wilson Lai177, Claus Lamm178, Wilbert Law179, Ljiljana Lazarevic180, Ai-Suan Lee181, Carmel Levitan182, Neil Levy183, David Lewis184, Manyu Li185, Yijun Lin186, Samuel Lins187, Gabriel Lins de Holanda Coelho188, Raquel London189, Elkin Oswaldo Luis Garcia190, Peter Mallik191, Mathi Manavalan192, Harry Manley193, Efisio Manunta194, Gabriela Mariana Marcu195, Evelina Marinova196, Magdalena Marszalek197, Marcel Martončik198, Sebastien Massoni199, Princess Lovella Maturan200, Randy McCarthy201, Kristin McCombs202, Shira Meir Drexler203, Mike Mensink204, Roberta Mereu205, Jasna Milosevic Dordevic206, Giovanna Mioni207, Jacob Miranda208, Michal Misiak209, Nadyanna Mohamed Majeed210, Aviv Mokady211, Débora Mola212, Arlen Moller213, Karis Moon214, David Moreau215, Kate Morris216, Farnaz Mosannenzadeh217, Hannah Moshontz218, Rafał Muda219, Aleksandra Muda220, Erica Musser221, Mor Nahum222, Izuchukwu Ndukaihe223, Mina Nedelcheva-Datsova224, Jana Nezkusilová225, Gustav Nilsonne226, Nora Nock227, Chris Noone228, Elisabeth Oberzaucher229, Chisom Esther Ogbonnaya230, Raquel Oliveira231, Jonas Olofsson232, Jerome Olsen233, Mediha Ömür234, Sandersan Onie235, Santiago Ordoñez-Riaño236, Nihal Ouherrou237, Asil Özdoğru238, Ma. Contesa Pagulayan239, Jayashree Panickar240, Myrto Pantazi241, Marietta Papadatou-Pastou242, Mariola Paruzel-Czachura243, Michal Parzuchowski244, Alessandro Paul245, Jeffrey Pavlacic246, Jen Perillo247, Elena Petrovskaya248, Gerit Pfuhl249, Jade Pickering250, Natalia Pilecka251, Isabel Pinto252, Ilse Pit253, Razieh Pourafshari254, Maximilian Primbs255, Ekaterina Pronizius256, Nikolay Rachev257, Theda Radtke258, Rima-Maria Rahal259, Crystal Reeck260, Niv Reggev261, Christina Reimer262, Ulf-Dietrich Reips263, Dongning Ren264, Matheus Ribeiro265, Hans Rocha IJzerman266, Marta Roczniewska267, Laurie Roehrich268, Jan Philipp Röer269, Ivan Ropovik270, Robert Ross271, Alexander Rothman272, Jose Carlos Roxas273, Susana Ruiz-Fernandez274, Marina Sabristov275, Asli Sacakli276, Joshua Sandry277, Anabela Santos278, Eylul Sarioguz279, Manisha Sawhney280, Nicolas Say281, Vidar Schei282, Kathleen Schmidt283, Lars Schulze284, Rachel Searston285, Martin Seehuus286, Daniela Serrato Alvarez287, Mohammad Hasan Sharifian288, Poppy Siahaan289, Nicolle Simonovic290, Anisha Singh291, Claudio SinghSolorzano292, Sladjana Sinkolova293, Miroslav Sirota294, Xin Song295, Piotr Sorokowski296, Jose Soto297, Ian Stephen298, Stefan Stieger299, Daniel Storage300, Jordan Suchow301, Isabela Sula302, Nami Sunami303, Clare Sutherland304, Therese E. Sverdrup305, Barnabas Szaszi306, Paulina Szwed307, Jennifer Taber308, Christian K. Tamnes309, Srinivasan Tatachari310, Anais Thibault Landry311, Andrew Thomas312, Katrine Krabbe Thommesen313, Anna Louise Todsen314, Nathan Torunsky315, Ulrich Tran316, Giovanni A. Travaglino317, Alexa Tullett318, Murat Tümer319, Jan Urban320, Anum Urooj321, Joan Urriago-Rayo322, Heather Urry323, Jim Uttley324, David Vaidis325, Zahir Vally326, Natasha van Antwerpen327, Juan Camilo Vargas Nieto328, Martin Vasilev329, Natalia Van Doren330, Argiro Vatakis331, Leigh Ann Vaughn332, Milica Vdovic333, Luis Vega334, Frederick Verbruggen335, Kévin Vezirian336, Luc Vieira337, Roosevelt Vilar338, Iris Vilares339, Johannes Vilsmeier340, Leticia Vivas341, Leonhard Volz342, Martin Voracek343, Selena Vračar344, Marek Vranka345, Piyaorn Wajanatinapart346, Radoslaw Walczak347, Erin Westgate348, Cassie Whitt349, Aaron Wichman350, Magdalena Wielgus351, Hannah Williams352, Megan Willis353, John Paul Wilson354, Qinyu Xiao355, Yuki Yamada356, Elvin Yao357, Siu Kit Yeung358, Karen Yu359, Ilya Zakharov360, Danilo Zambrano Ricaurte361, Ignazio Ziano362, Janis Zickfeld363, Andras Zsido364, Barbara Zuro365

***Psychological Science Accelerator Affiliations***

1Humboldt State University, Arcata, USA 2Institute of Psychology, ELTE, Budapest, Hungary 3Institute of Psychology, University of Presov, Prešov, Slovakia 4Universite de Grenoble Alpes, Grenoble, France 5Muğla Sıtkı Koçman University, Mugla, Turkey 6Tarbiat Modares University, Tehran, Iran 7National Research University Higher School of Economics, Moscow, Russia 8University of Limerick, Ireland, Limerick, Ireland 9University of Florida, Gainesville, FL, USA 10Mohammed V University of Rabat, Rabat, Morocco 11Ankara, Turkey 12London School of Economics and Political Science, London, UK 13University of Belgrade, Serbia 14Faculty of Medicine, University of Coimbra CIBIT, University of Coimbra, Coimbra, Portugal 15Universidad Regional Amazónica Ikiam Tena Ecuador 16FPCEUP, Vila Nova de Gaia, Portugal 17Institute of Business Administration, Karachi, Pakistan 18Åbo Akademi University, Turku, Finland 19Alex Ekwueme Federal University Ndufu-Alike Ikwo Ebonyi State, Nigeria 20ISCTE-Instituto Universitário de Lisboa, Lisboa, Portugal 21De La Salle University, Manila, Philippines 22Department of Psychology, University of Crete, Rethymno, Greece 23Department of Psychology, University of Oslo, Oslo, Norway 24University of Southern California, Los Angeles, CA, USA 25Baylor College of Medicine, Richmond, VA, USA 26Centre "Homme, Espaces, Sociétés", Mohammed V University in Rabat, Rabat, Morocco 27Institute of Psychology, Prešov, Slovakia 28University of Minnesota-Twin Cities, Minneapolis, MN, USA 29Baskent University, Ankara, Turkey 30Institute Psychology, University of Presov, Presov, Slovakia 31Institute of Psychology, Jagiellonian University, Krakow, Poland 32Saint Joseph's University, Philadelphia, PA, USA 33Dr Lazar Vrkatic Faculty of Law and Business Studies, Novi Sad, Serbia 34Franklin and Marshall College, Lancaster, PA, USA 35Pavol Jozef Safarik University in Kosice, Kosice, Slovakia 36Institute of Psychology, Pecs, Hungary 37CLLE, Université de Toulouse, CNRS, UT2J, Toulouse, France 38University of Tabriz, Tabriz, Iran 39National University of Cordoba, Argentina, Cordoba, Argentina 40Universiti Utara Malaysia, Sintok, Malaysia 41Unaffiliated, San Donà di Piave, Italy 42University of Mannheim, Mannheim, Germany 43University of Wrocław, Wroclaw, Poland 44Radboud University, Behavioural Science Institute, Nijmegen, Netherlands 45Unaffiliated, Moscow, Russia 46Université Mohammed v Rabat, Tanger, Morokko 47University of St.Gallen, St. Gallen, Switzerland 48Nova Southeastern University, Pembroke Pines, FL, USA 49Instituto de Investigación Científica, Universidad de Lima, Lima, Peru 50Université de Paris, Paris, France 51Charles University, Environment Center, Praha, Czech Republic 52Institute of Psychology, University of Graz, Graz, Austria 53Harrisburg University of Science and Technology, Bethlehem, PA, USA 54Ghent University, Ghent, Belgium 55University of Birmingham, Birmingham, UK 56Leiden University, Utrecht, Netherlands 57Universidad de los Andes, Bogotá D.C, Colombia 58Dominican University, River Forest, USA 59UQAM, Montreal, Canada 60Department of General Psychology, University of Padova, Padova, Italy 61University of California, Irvine, Ivine, CA, USA 62Universititi Tiranes, Tirana, Albania 63Ashland University, Ashland, OH, USA 64Ghent University, Gent, Belgium 65Tzu-Chi University, Taipei, Hualien, Taiwan 66University of Macau, Macau, China 67University of Essex, London, UK 68Michigan State University, East Lansing, MI, USA 69Fo Guang University, Yilan County, Taiwan 70Middle East Technical University, Ankara, Turkey 71University of Tennessee-Knoxville, Knoxville, TN, USA 72Nova Southeastern University, Fort Lauderdale, FL, USA 73University of Birmingham, Birmingham, UK 74Universidad de Sonora, Hermosillo, México 75Instituto de Investigaciones Psicológicas, Consejo Nacional de Investigaciones Científicas y Tecnológicas (CONICET), Universidad Nacional de Córdoba (UNC), Córdoba, Argentina 76Faculty of Psychology and Education Sciences of the University of Porto Amarante, Portugal 77Universidad de Los Andes, Bogotá, D.C., Colombia 78University of Haifa, Kiriat Ono, Israel 79Bar Ilan University, Ramat-Gan, Israel 80Başkent University, Ankara, Turkey 81University of Padova, Zovencedo, Italy 82Laboratory for Experimental Psychology, Department of Psychology, Institute for Philosophy, Faculty of Philosophy, University of Belgrade, Beograd-Stari, Grad, Srbija 83Wittenberg University, Springfield, OH, USA 84Princeton University, Princeton, NJ, USA 85National Autonomous University of México, Faculty of Higher Studies, Iztacala, Mexico City, Mexico 86Unaffiliated, Marano di Napoli, Italy 87Faculty of Philosophy, Psychology, Strumica, North Macedonia 88Brisbane, Australia 89Mohamed V University of Raba, Rabat, Morocco 90Ghent University, Ghent, Belgium 91Kozminski University, Warsaw, Poland 92Guangzhou University, Guangzhou, China 93National Research University Higher School of Economics, Moscow, Russia 94Ghent University, Ghent, Belgium 95Unaffiliated, Harrison Twp., USA 96Ankara, Turkey 97Unaffiliated, Turin, Italy 98Izmir University of Economics, Izmir, Turkey 99University College London, London, UK 100University of Navarra, Pamplona, Spain 101Coventry University, Coventry, UK 102University of Hong Kong, Hong Kong, Hong Kong 103Max Planck Institute for Research on Collective Goods, Bonn, Germany 104Comenius University in Bratislava, Faculty of Social and Economic Sciences, Bratislava, Slovak Republic 105University of Birmingham, School of Psychology, Birmingham, UK 106University of Vienna,Vienna, Austria 107ESG UQAM, Montréal, Canada 108Université Grenoble Alpes, Gières, France 109Universidad de Sonora, Hermosillo, Mexico 110University of East London and King's College London, London, UK 111University of the Fraser Valley, Surrey, Canada 112Wilfrid Laurier University, Waterloo, Canada 113Academy of Sciences and Arts of North Macedonia, Skopje, North Macedonia 114FOM Hochschule für Oekonomie & Management, Hildesheim, Germany 115Kingston University London, London, UK 116Sapienza University of Rome, Rome, Italy 117University College London, London, UK 118National Research University Higher School of Economics, Moscow, Russia 119New Bulgarian University, Sofia, Bulgaria 120University of Wroclaw, Wrocław, Poland 121Jacobs University Bremen, Bremen, Germany 122Doctoral School of Psychology, ELTE Eotvos Lorand University, Institute of Psychology, ELTE Eotvos Lorand University, Budapest, Hungary 123University of Essex, Colchester, UK 124Singapore Management University, Singapore, Singapore 125Charles University, Chapel Hill, NC, USA 126University of Tehran, Tehran, Iran 127California State University, Northridge, West Hills, Los Angeles, CA, USA 128UNAM Mexico City, Mexico 129University of Graz, Graz, Austria 130Manchester Metropolitan University, Manchester, UK 131Pavol Jozef Šafarik University, Košice, Slovakia 132New Bulgarian University, Sofia, Bulgaria 133Institute of European Studies and International Relations, Faculty of Social and Economic Sciences, Comenius University in Bratislava, Bratislava, Slovakia 134Ministerstvo zdravotnictví České republiky (Ministry of Health Czech Republic), Praha/Prague, Czech Republic 135Kyushu University, Fukuoka, Japan 136Eindhoven University of Technology, Eindhoven, Netherlands 137Waseda University, Tokyo, Japan 138Tilburg University, Tilburg, Netherlands 139NYU, New York, NY, USA 140University of Nottingham Malaysia, Kuala Lumpur, Malaysia 141University of Delaware, Newark, DE, USA 142Universidad del Rosario, Bogotá D.C., Colombia 143Stockholm University, Department of Psychology, Stockholm, Sweden 144Tongji University, Shanghai, China 145Universidad De Los Andes, Bogota, Colombia 146Virginia Commonwealth University, Richmond, VA, USA 147BCPS (Bangladesh Clinical Psychology Society), Dublin, Ireland 148University of Cambridge, Cambridge, UK 149Department of Psychology; Faculty of Arts; Pavol Jozef Šafárik University in Košice, Košice, Slovakia 150Faculty of Education, Matej Bel University, Banska Bystrica, Slovakia 151Toulouse University, Toulouse, France 152London School of Economics & Political Science (LSE), London, UK 153Başkent Univesity, Unstitute of Social Science, Ankara, Turkey 154Mugla Sitki Kocman University, Mugla, Turkey 155UCL, Nicosia, Cyprus 156 University of Cyprus, Nicosia, Cyprus 157University of Cyprus, Department of Psychology, Nicosia, Cyprus 158Mohammed V University, Rabat, Morocco 159University of Delhi, Delhi, India 160Jagiellonian University, Czestochowa, Poland 161 Unaffiliated, Florence, Italy 162Mugla Sitki Kocman University, Muğla, Turkey 163Western Sydney University, Ashfield, Australia 164University of Bergen, Bergen, Norway 165Jagiellonian University, Krakow, Poland 166Laboratory for Neurocognition and Applied Cognition, Faculty of Philosophy, University of Belgrade, Belgade, Serbia 167University of Wrocław, Wrocław, Poland 168University of Pécs, Pécs, Hungary 169Dominican University, River Forest, IL, USA 170Faculty of Humanities and Social Sciences, Osijek, Croatia 171Purdue University, West Lafayette, IN, USA 172Senshu University, Tokyo, Japan 173Psykologisk Insititutt, Universitetet i Oslo, Oslo, Norway 174University of Warsaw, Warsaw, Poland 175Unaffiliated, Hong Kong, Hong Kong 176INSEAD, Singapore, Singapore 177Department of Cognition, Emotion, and Methods in Psychology, Faculty of Psychology, University of Vienna, Vienna, Austria, 179The Education University of Hong Kong, Hong Kong, Hong Kong 180Institute of psychology and Laboratory for research of individual differences, Faculty of Philosophy, University of Belgrade, Belgrade, Serbia 181Sunway University, Petaling Jaya, Malaysia 182Occidental College, Los Angeles, CA, USA 183 Macquarie University, Sydney, Australia 184Murdoch University, Perth, Australia 185University of Louisiana at Lafayette, Lafayette, LA, USA 186University of Florida, Gainesville, FL, USA 187Porto, Portugal 188University College Cork, Cork, Ireland 189Ghent University, Gent, Belgium 190Universidad de Navarra, Spain 191 Ashland University, Ashland, OH, USA 192University of Minnesota - Twin Cities, Minneapolis, MN, USA 193Chulalongkorn University, Bangkok, Thailand 194CLLE, Université de Toulouse, CNRS, UT2J, Toulouse, France 195Lucian Blaga University of Sibiu, SIBIU, România 196Sofia University ''St Kliment Ohridski'' Sofia, Bulgaria 197Uniwersytet Humanistycznospołeczny SWPS, Sopot Gdańsk, Poland 198University of Presov, Prešov, Slovakia 199University of Lorraine, Nancy, France 200University of the Philippines Diliman, Metro Manila, Philippines 201Northern Illinois University, DeKalb, IL, USA 202Wheeling University, Wheeling, WV, USA 203Department of Cognitive Psychology, Institute of Cognitive Neuroscience, Ruhr University Bochum, Bochum, Germany 204 University of Wisconsin-Stout, White Bear Township, WI, USA 205Unaffiliated, Ozzano, Italia 206Faculty of Media and Communication, Belgrade, Serbia 207Department of General Psychology, University of Padova, Padova, Italy 208The University of Alabama, Tuscaloosa, AL, USA 209University of Wroclaw, Poznan, Poland 210Singapore Management University, Singapore, Singapore 211Ben Gurion University, Beer Sheva, Israel 212Instituto de Investigaciones Psicológicas, Córdoba, Argentina 213Illinois Institute of Technology, Chicago, IL, USA 214Kingston University London, Kingston Upon Thames, UK 215University of Auckland, Auckland, New Zealand 216Willamette University, Salem, OR, USA 217Radboud University, Nijmegen, Netherlands 218University of Wisconsin Madison, Madison, WI, USA 219Maria Curie-Sklodowska University, Lublin, Poland 220Flow Research Center, Lublin, Polska 221Florida International University, Miami, FL, USA 222Hebrew University of Jerusalem, Tel Aviv, Israel 223Alex Ekwueme Federal University, Ndufu-Alike, Abakaliki, Ebonyi State, Nigeria 224Sofia University, St. Kliment Ohridski, Sofia, Bulgaria 225Pavol Jozef Safarik University, Kosice, Slovensko 226Karolinska Institutet, Stockholm, Sweden 227Case Western Reserve University, Cleveland, OH, USA 228NUI Galway, Galway, Ireland 229University of Vienna, Urban Human, Vienna, Austria 230Alex Ekwueme Federal University Ndufu-Alike Nigeria, Abakaliki, Ebonyi State, Nigeria 231ISCTE-IUL (CIS-IUL), Lisbon, Portugal 232Stockholm University, Stockholm, Sweden 233Max Planck Institute for Research on Collective Goods, Bonn, Germany 234Hasan Kalyoncu University, Gaziantep, Turkey 235Black Dog Institute & UNSW Sydney, Sydney, Australia 236University of Guadalajara, Bogotá, Colombia 237Lhumain Laboratory - Paul Valery University - Montpellier 3, France LAROSERI Laboratory- Chouaib Doukkali University - El Jadida, Morocco, Montpellier, France 238Üsküdar University, İstanbul, Turkey 239University of the Philippines, Diliman Quezon City, Philippines 240Unaffiliated, Muscat, Oman 241Oxford Internet Institute, Oxford, UK 242National and Kapodistrian University of Athens, Athens, Greece 243Institute of Psychology, Moral Psychology Center, Katowice, Poland 244SWPS University of Social Sciences and Humanities, Sopot, Gdansk, Poland 245Unaffiliated, Frankfurt am Main, Germany 246University of Mississippi, Oxford, MS, USA 247Indiana University of Pennsylvania, Indiana, PA, USA 248University of York, York, UK 249UiT The Arctic University of Norway, Tromsø, Norway 250University of Manchester, University of York, Manchester, UK 251Unaffiliated, Warszawa, Poland 252University of Porto, Porto, Portugal 253Institute of Cognitive and Evolutionary Anthropology, University of Oxford, Oxford, UK 254Department of psychology, Faculty of Psychology and Education, University of Tehran, Tehran, Iran 255Radboud University, Nijmegen, Netherlands 256Universitiy of Vienna, Vienna, Austria 257Sofia University, St. Kliment Ohridski, Sofia, Bulgaria 258Witten/Herdecke University, Witten, Germany 259Tilburg University, Bonn, German 260Temple University, Philadelphia, PA, USA 261Ben Gurion University, Tel Aviv, Israel 262Ghent University, Gent, Belgium 263University of Konstanz, Kreuzlingen, Switzerland 264Tilburg University, Tilburg, Netherlands 265University of Brasilia, Uberaba, Brasil 266Université Grenoble Alpes, Grenoble, France 267SWPS University of Social Sciences and Humanities, Poland; Karolinska Institutet, Stockholm, Stockholm, Sweden 268Indiana University of Pennsylvania, Indiana, PA, USA 269Witten/Herdecke University, Witten, Germany 270Charles University, Faculty of Education, Institute for Research and Development of Education & University of Presov, Faculty of Education, Presov, Slovakia 271Maccquarie University, Sydney, Australia 272University of Minnesota, Minneapolis, MN, USA 273University of the Philippines, Pasig City, Philippines 274FOM University of Applied Sciences, Leibniz-Institut für Wissensmedien; LEAD Research Network, Eberhard Karls University Tübingen, Germany 275Unaffiliated Parma, Italia 276Baskent University, Ankara, Turkey 277Montclair State University, Montclair, NJ, USA 278ISAMB, Faculty of Medicine, University of Lisbon; Faculty of Human Kinectics, University of Lisbon; CIS-IUL, ISCTE-University Institute of Lisbon Lisboa Portugal 279Baskent University, Ankara, Turkey 280Department of Psychology, University of Mary, Bismarck, ND, USA 281Charles University, Prague, Czechia 282Department of Strategy and Management, NHH Norwegian School of Economics, Bergen, Norway 283Southern Illinois University, Carbondale, Carbondale, IL, USA 284Freie Universität Berlin, Berlin, Germany 285The University of Adelaide, Adelaide, Australia 286Middlebury College, Middlebury, VT, USA 287Fundación Universitaria Konrad Lorenz, Bogotá, Colombia 288Department of Psychology, Faculty of Psychology and Education, University of Tehran, Tehran, Iran 289University of Cologne, Wiesbaden, Germany 290Kent State University, Kent, OH, USA 291Busara Center of Behavioural Economics, Nairobi, Kenya 292Sapienza Università Roma, Vicenza, Italia 293Unaffiliated, Skopje, Macedonia 294University of Essex, Colchester, UK 295University of Minnesota, Twin Cities, Minneapolis, MN, USA 296Institute of Psychology, University of Wrocław, Wrocław, Poland 297Penn State University, State College, PA, USA 298Macquarie University, Thornleigh, Australia 299Karl Landsteiner University of Health Sciences, Krems an der Donau, Austria 300University of Denver, Denver, CO, USA 301Stevens Institute of Technology, New York, NY, USA 302Unaffiliated, San Polo d'Enza, Italy 303 University of Delaware, Newark, DE, USA 304University of Aberdeen, Aberdeen, Scotland 305NHH Norwegian School of Economics, Bergen Norway 306Institute of Psychology, ELTE Eötvös Loránd University, Budapest, Hungary 307Jagiellonian University Kraków, Poland 308Kent State University, Kent, OH, USA 309 PROMENTA Research Center, Department of Psychology, University of Oslo, Oslo, Norge 310T A Pai Management Institute, Manipal, India 311Concordia, Montreal, Canada 312Swansea University, Swansea, UK 313University of St Andrews, St Andrews, Scotland 314University of St Andrews, St Andrews, United Kingdom 315Department of Psychology, University of Minnesota Twin Cities, Minneapolis, MN, USA 316University of Vienna, Vienna, Austria 317University of Kent; Chinese University of Hong Kong, Shenzhen, China 318University of Alabama, Tuscaloosa, AL, USA 319Baskent University, Ankara, Turkey 320BERLAB, Charles University, Prague, Czech Republic 321La Trobe University, Melbourne, Australia 322Unaffiliated, Bogotá, Colombia 323Tufts University, Medford, MA, USA 324University of Sheffield, Sheffield, UK 325Université de Paris, Paris, France 326UAE University, Al Ain, United Arab Emirates 327University of Adelaide, Adelaide, Australia 328Universidad de los Andes, Bogotá, Colombia 329Bournemouth University, Bournemouth, UK 330The Pennsylvania State University, University Park, PA, USA 331Panteion University of Social and Political Sciences, Athens, Greece 332Ithaca College, Ithaca, NY, USA 333Faculty of media and communication, Singidunum University, Belgrade, Serbia 334Universidad Latina de Costa Rica San Jose, Costa Rica 335Ghent University, Gent, Belgium 336University Grenoble Alpes, Grenoble, France 337Univsersity of Strasbourg/ University of Paris-Descartes, Strasbourg, France 338Faculdades Integradas de Patos, Joao Pessoa, Brazil 339University of Minnesota, Minneapolis, MN, USA 340Department of Cognition, Emotion, and Methods in Psychology, University of Vienna, Vienna, Austria 341IPSIBAT, National University of Mar del Plata-CONICET-CIC, Mar del Plata, Argentina 342University of Vienna, Vienna, Austria 343University of Vienna, Vienna, Austria 344Belgrade, Serbia 345Charles University, Prague, Czech Republic 346Suranaree University of Technology, Nakhon Ratchasima, Thailand 347University of Opole, Opole, Polska 348Department of Psychology, University of Florida, FL, USA 349University of Alabama, Tuscaloosa, AL, USA 350Western Kentucky University, Bowling Green, KY, USA 351Jagiellonian University, Kraków, Poland 352Oregon State University, Corvallis, OR, USA 353Australian Catholic University, Sydney, Australia 354Montclair State University, Jersey City, NJ, USA 355University of Hong Kong, Hong Kong, Hong Kong 356Kyushu University, Fukuoka, Japan 357Claremont Graduate University, Los Angeles, CA, USA 358The University of Hong Kong, Hong Kong, China 359Sewanee: The University of the South, Sewanee, TN, USA 360Psychological Institute of Russian Academy of Education, Moscow, Russia 361Fundación Universitaria Konrad Lorenz, Bogotá, Colombia 362Grenoble Ecole de Management, Grenoble, France 363University of Oslo, Oslo, Norway 364Institute of Psychology, University of Pécs, Pécs, Hungary 365Faculty of Humanities and Social Sciences Osijek, Dublin, Ireland
